# Supplementary material for: Investigating the iodide and bromide ion exchange in metal halide perovskite single crystals and thin films
Source: Royal Society of Chemistry journal article supplement (doi:10.1039/d1cc01543e), 2021-01-01
Supplement: d1cc01543e1.pdf [file d1cc01543e1.pdf]

## Supporting Information

### Investigating the iodide and bromide ion exchange in metal halide perovskite single crystals and thin films

*Qingyi Huang<sup>1#</sup>, Zhe Li<sup>2#</sup>, Xiayan Chen<sup>1</sup>, Yongkang Xia<sup>1</sup>, Ziwei Zheng<sup>1</sup>, Anyi Mei<sup>1</sup>, Kai Zhu<sup>3</sup>, Yue Hu<sup>1</sup>, Ti Wang<sup>2</sup>, Yaoguang Rong<sup>1\*</sup>, Hongwei Han<sup>1</sup>*

<sup>1</sup> *Wuhan National Laboratory for Optoelectronics, China-EU Institute for Clean and Renewable Energy, Huazhong University of Science and Technology, Wuhan 430074, Hubei, P. R. China*

<sup>2</sup> *School of Physics and Technology and Key Laboratory of Artificial Micro- and Nanostructures of Ministry of Education, Wuhan University, Wuhan 430072, China.*

<sup>3</sup> *School of Information Science and Engineering, Nanjing University Jinling College, No. 8 Xuefu Road, Nanjing 210089, Jiangsu, P. R. China.*

*E-mail: ygrong@hust.edu.cn*

*#These authors contributed equally to this work.*

## **Experiment**

### **Materials:**

Lead(II) iodide ( $\text{PbI}_2$ , 99.99%) was purchased from Tokyo Chemical Industry (TCI). Methylammonium iodide (MAI), methylammonium bromide (MABr) and lead bromide ( $\text{PbBr}_2$ , 99.9%) were purchased from Xi'an Polymer Light Technology Corp.  $\gamma$ -butyrolactone (GBL), *N,N*-Dimethylformamide (DMF) and ethanol were purchased from Sigma-Aldrich. All the chemicals were used as received without further purification. The FTO glass substrates were purchased from Yingkou OPV Tech Co., Ltd. .

### **Synthesis of perovskite single crystals:**

The perovskite single crystals were synthesized according to previous report<sup>1</sup>.  $\text{MAPbI}_3$  single crystal: MAI and  $\text{PbI}_2$  (molar ratio 1:1) were dissolved in GBL with a concentration of 1.23 M. Then the solution was heated up to 100°C for overnight, forming small seed crystals in size of 1~2 mm. One of the seed crystals was selected and transferred into a fresh solution at 100°C for further crystal growth. After 1~2 days, the seed crystal grew to a single crystal in size of 7~10 mm.  $\text{MAPbBr}_3$  single crystal: MABr and  $\text{PbBr}_2$  (molar ratio 1:1) were dissolved in DMF with a concentration of 0.7 M. Then the solution was heated up to 100°C for overnight, forming small seed crystals in size of 1~2 mm. One of the seed crystals was selected and transferred into a fresh solution at 100°C for further crystal growth. After 1~2 days, the seed crystal grew to a single crystal in size of 7~10 mm.

**Characterization:** The digital images were captured by Leica Q camera and Leica DM2700M. The UV-visible absorption (UV-vis) spectrum was tested by a UV-vis-NIR spectrophotometer (SolidSpec-3700). The X-Ray Diffraction (XRD) spectra were measured with an X'pert PRO X-ray diffractometer by Cu K $\alpha$  radiation under conditions of 40 mA and 40 kV with a range from 10° to 40°, the scanning speed is 5° per min. The Scanning electron microscope (SEM) was obtained by a Nova NanoSEM 450 field emission SEM. The Photoluminescence (PL) images and spectra were obtained using a mercury lamp as excitation after passing through a 460-490 nm band-pass filter. Then the signal passed through a 520 nm long-pass filter before collected by a CCD camera (Tucsen, TCH-1.4CICE) or a spectrometer (Renishaw inVia).

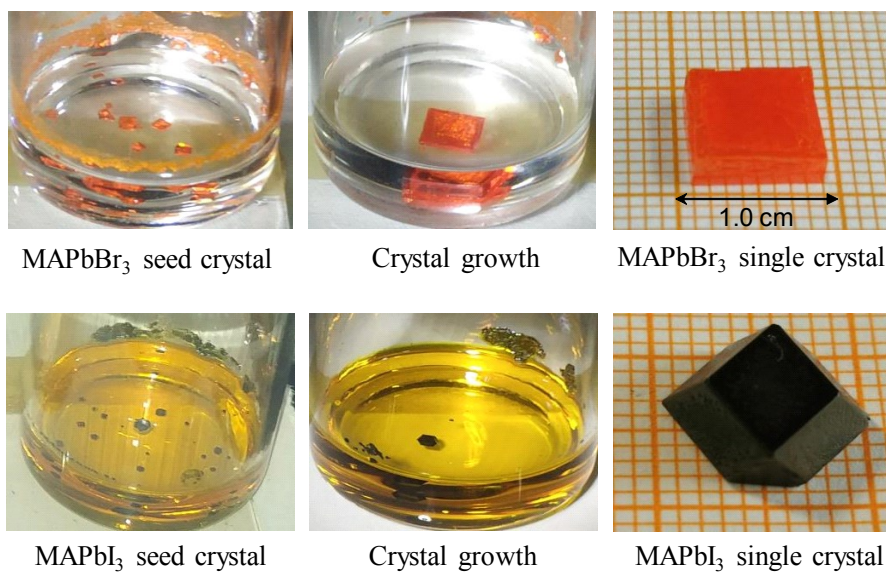

**Figure S1.** The process for synthesizing MAPbBr<sub>3</sub> and MAPbI<sub>3</sub> single crystals.

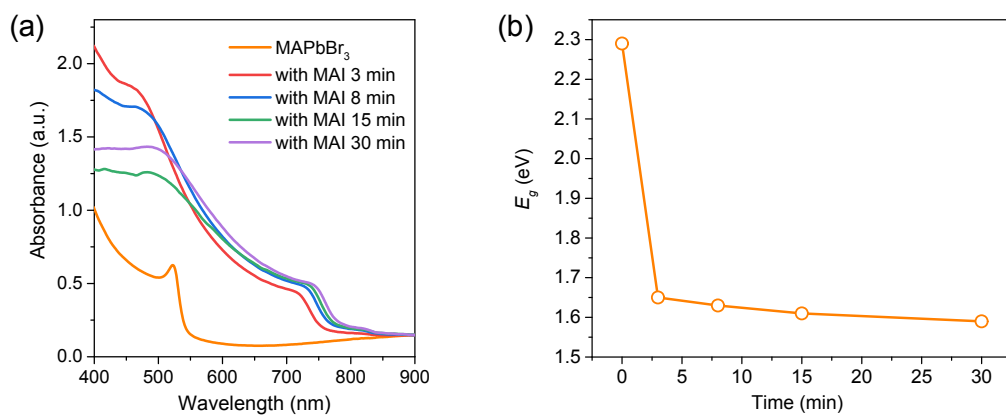

**Figure S2.** (a) UV-Vis spectra of MAPbBr<sub>3</sub> thin films before and after dipping in MAI solution for different time. (b)  $E_g$  dependence on dipping time.

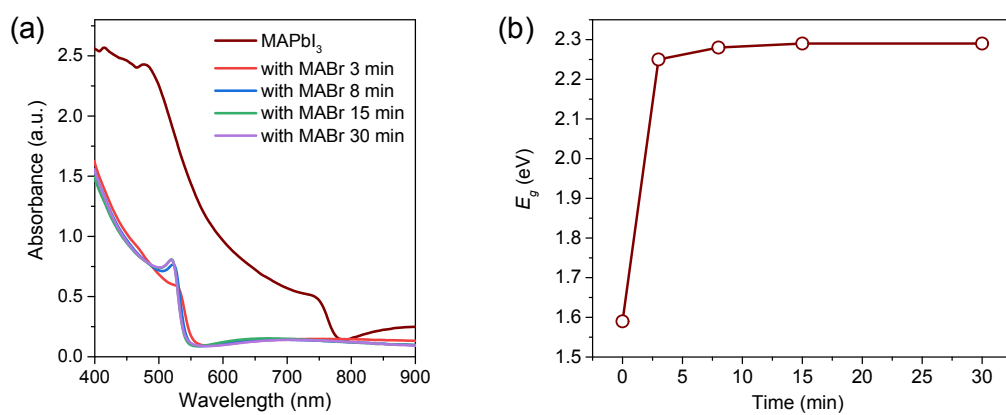

**Figure S3.** (a) UV-Vis spectra of MAPbI<sub>3</sub> thin films before and after dipping in MABr solution for different time. (b)  $E_g$  dependence on dipping time.

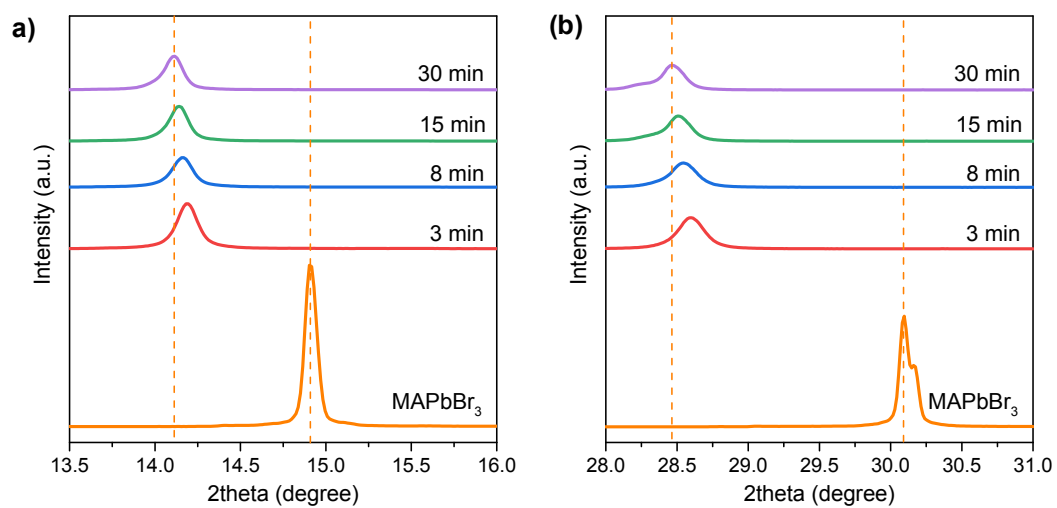

**Figure S4.** XRD pattern of MAPbBr<sub>3</sub> thin film before and after anion exchange reaction for different time.

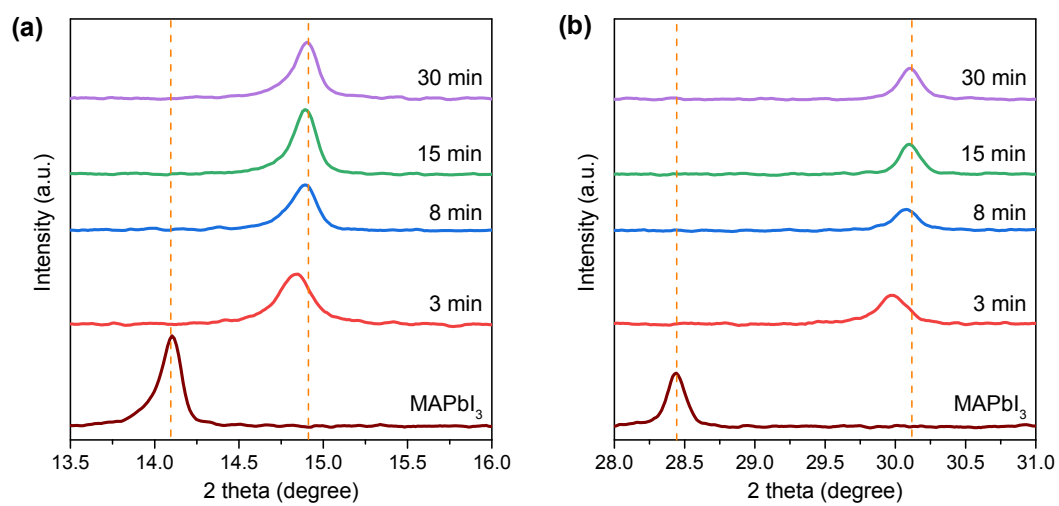

**Figure S5.** XRD pattern of MAPbBr<sub>3</sub> thin film before and after anion exchange reaction for different time.



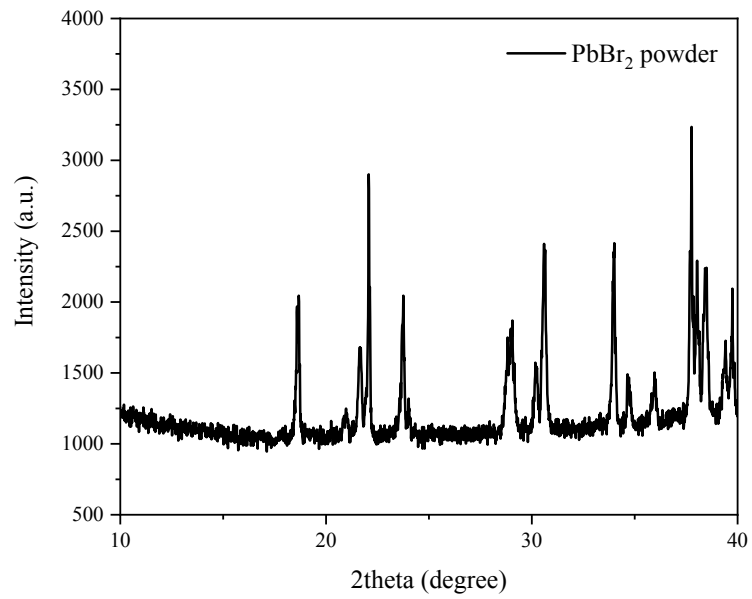

**Figure S6.** XRD pattern of PbBr<sub>2</sub> powders.

## Reference

1. Y. Liu, Z. Yang, D. Cui, X. Ren, J. Sun, X. Liu, J. Zhang, Q. Wei, H. Fan, F. Yu, X. Zhang, C. Zhao and S. Liu, *Advanced Materials*, 2015, **27**, 5176-5183.
